# Supplementary material for: Facile synthesis of ultrasmall hexagonal NaYF4:Yb3+,Er3+ upconversion nanocrystals through temperature oscillation
Source: Royal Society of Chemistry journal article supplement (doi:10.1039/c7qi00216e), 2017-01-01
Supplement: c7qi00216e1.pdf [file c7qi00216e1.pdf]

**Electronic Supplementary Information**

**Facile synthesis of ultrasmall hexagonal NaYF<sub>4</sub>:Yb<sup>3+</sup>, Er<sup>3+</sup> upconversion nanocrystals through temperature oscillation**

Dongdong Li,<sup>a</sup> Wen-Yong Lai,<sup>\*ab</sup> Qiyue Shao<sup>\*c</sup> and Wei Huang<sup>ab</sup>

<sup>a</sup> Key Laboratory for Organic Electronics and Information Displays (KLOEID) & Institute of Advanced Materials (IAM), Jiangsu National Synergetic Innovation Center for Advanced Materials (SICAM), Nanjing University of Posts & Telecommunications, 9 Wenyuan Road, Nanjing 210023, China. E-mail: iamwylai@njupt.edu.cn

<sup>b</sup> Key Laboratory of Flexible Electronics (KLOFE) & Institute of Advanced Materials (IAM), Jiangsu National Synergetic Innovation Center for Advanced Materials (SICAM), Nanjing Tech University (NanjingTech), 30 South Puzhu Road, Nanjing 211816, China

<sup>c</sup> Jiangsu Key Laboratory of Advanced Metallic Materials, Department of Materials Science and Engineering, Southeast University, Nanjing 211189, China. E-mail: qiyueshao@seu.edu.cn

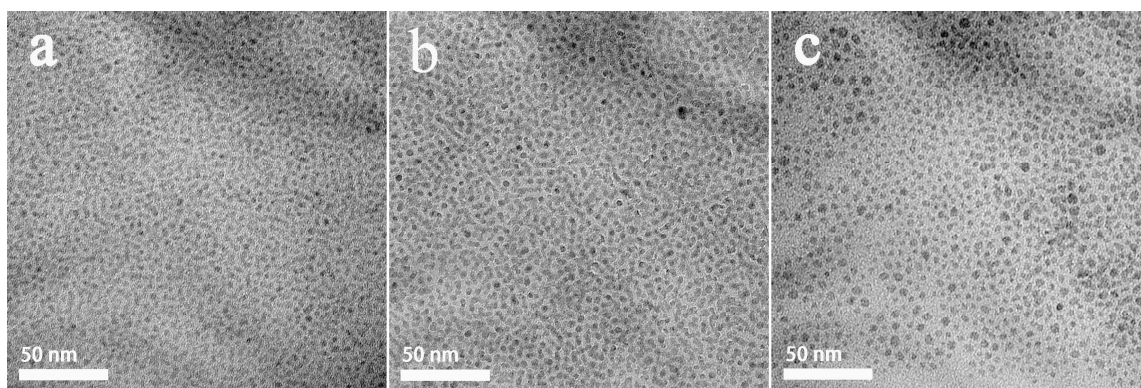

**Fig. S1** TEM images of the UCNPs synthesized at different reaction temperatures: (a) 260 °C; (b) 270 °C; (c) 280 °C. Other synthesis conditions are the same as the standard sample in Fig. 1a.

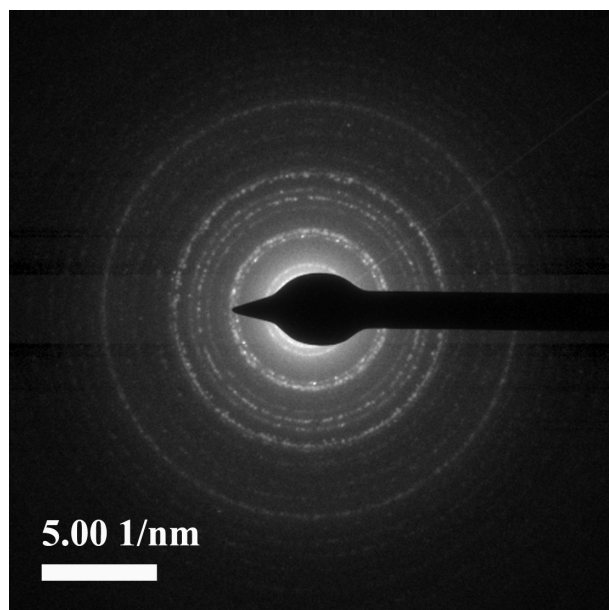

**Fig. S2** SAED pattern of the 10.8 nm NaYF<sub>4</sub>: Yb<sup>3+</sup>, Er<sup>3+</sup> nanocrystals.
